# Supplementary material
Source: PubMed Central journal article supplement (PMC5075065)
Supplement: AAC.00664-16_zac011165668so1.pdf [file AAC.00664-16_zac011165668so1.pdf]

**Genomic analysis of the evolution of fluoroquinolone resistance in  
*Mycobacterium tuberculosis* prior to tuberculosis diagnosis**

Danfeng Zhang<sup>1,2\*</sup>, James E. Gomez<sup>1\*</sup>, Jung-Yien Chien<sup>3,4</sup>, Nathan Haseley<sup>1</sup>,  
Christopher A. Desjardins<sup>1</sup>, Ashlee M. Earl<sup>1</sup>, Po-Ren Hsueh<sup>4,5†</sup>, Deborah T. Hung<sup>1,6,7,8,†</sup>

**Supplemental Materials**

- **SUPPLEMENTAL FIGURE 1. Sanger traces of *gyrA* PCR product from ambiguous samples**
- **SUPPLEMENTAL TABLE 1. SNP differences between clones isolated from original samples**

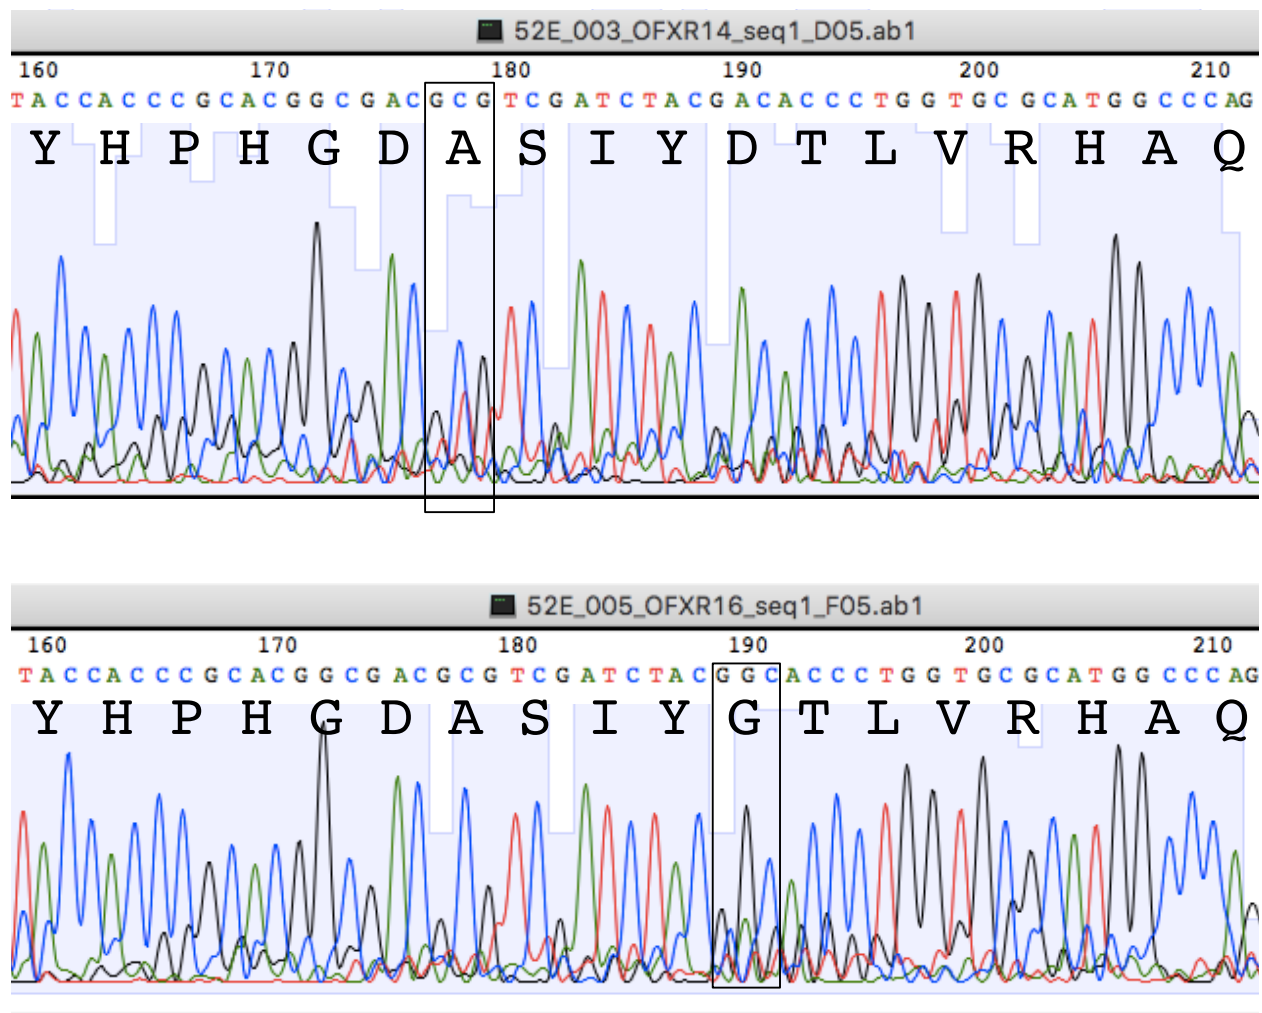

**Supplemental Figure 1. Sanger traces of *gyrA* PCR product from ambiguous samples.** Shown are the quinolone resistance determining regions from samples 14 and 16. In sample 14 (top), the alanine 90 codon GCG shows a clear minor T peak at the second position, while in sample 2, a minor A peak is seen in the second position of the glycine 94 codon (aspartic acid, codon GAC, is wt).

**SUPPLEMENTAL TABLE 1. SNP differences between clones isolated from original samples**

**Patient 1  
OFXR-2**

| <b>position<sup>1</sup></b> | <b>clone</b> | <b>class<sup>2</sup></b> | <b>gene<sup>3</sup></b> | <b>protein<sup>4</sup></b> | <b>codon</b> | <b>AA<sup>5</sup></b> |
|-----------------------------|--------------|--------------------------|-------------------------|----------------------------|--------------|-----------------------|
| 7570                        | 2R           | NS                       | Rv0006                  | GyrA                       | GCG>GTG      | A90V                  |
| 1432840                     | 2S           | NS                       | Rv1280c                 | OppA                       | GCG>ACG      | A201T                 |
| 2468380                     | 2R           | S                        | Rv2203                  | CHP                        | GAC>GAT      |                       |
| 2875787                     | 2S           | S                        | Rv2555c                 | AlaS                       | GGC>GGG      |                       |
| 3252530                     | 2S           | NS                       | Rv2932                  | PpsB                       | ACG-GCG      | T487A                 |

**Patient 2  
OFXR-11**

| <b>position<sup>1</sup></b> | <b>clone</b> | <b>class<sup>2</sup></b> | <b>gene<sup>3</sup></b> | <b>protein<sup>4</sup></b> | <b>codon</b> | <b>AA<sup>5</sup></b> |
|-----------------------------|--------------|--------------------------|-------------------------|----------------------------|--------------|-----------------------|
| 7572                        | 11R3         | NS                       | Rv0006                  | GyrA                       | TCG>CCG      | S91P                  |
| 7581                        | 11R1         | NS                       | Rv0006                  | GyrA                       | GAC>AAC      | D94N                  |
| 7582                        | 11R2         | NS                       | Rv0006                  | GyrA                       | GAC>GGC      | D94G                  |
| 800170                      | 11S          | IG                       | <Rv0699<br>Rv0700>      |                            |              |                       |

**Patient 3  
OFXR-14**

| <b>position<sup>1</sup></b> | <b>clone</b> | <b>class<sup>2</sup></b> | <b>gene<sup>3</sup></b> | <b>protein<sup>4</sup></b> | <b>codon</b> | <b>AA<sup>5</sup></b> |
|-----------------------------|--------------|--------------------------|-------------------------|----------------------------|--------------|-----------------------|
| 6579                        | 14R2         | NS                       | Rv0005                  | GyrB                       | TCC>TTC      | S486F                 |
| 7570                        | 14R1         | NS                       | Rv0006                  | GyrA                       | GCG>GTG      | A90V                  |
| 13061                       | 14S          | IG                       | Rv0009><br><Rv0010c     |                            |              |                       |
| 197785                      | 14R1         | NS                       | Rv0168                  | YrbE1B                     | ATC>ACC      | I43T                  |
| 284374                      | 14R2         | S                        | Rv0236c                 | AftD                       | ACC>ACT      |                       |
| 347536                      | 14R2         | S                        | Rv0284                  | EccC3                      | ACA>ACC      |                       |
| 396125                      | 14S          | IG                       | <Rv0330c<br>Rv0331>     |                            |              |                       |
| 580548                      | 14S          | S                        | Rv0490                  | SenX3                      | AAC>AAT      |                       |
| 756614                      | 14R1         | NS                       | Rv0663                  | AtsD                       | GGG>AGG      | G160R                 |
| 1017055                     | 14R1         | IG                       | Rv0912 ><br><Rv0913c    |                            |              |                       |
| 1598662                     | 14R1         | NS                       | Rv1423                  | WhiA                       | GAT>TAT      | D253Y                 |
| 1741178                     | 14R1         | S                        | Rv1537                  | DinX                       | ATC>ATT      |                       |
| 2058051                     | 14R2         | NS                       | Rv1815                  | CHP                        | CCG>CTG      | P175L                 |
| 2120894                     | 14R2         | S                        | Rv1870c                 | CHP                        | GCG>GCA      |                       |
| 2301782                     | 14R2         | S                        | Rv2048c                 | Pks12                      | GTA>GTG      |                       |
| 2301782                     | 14R1         | S                        | Rv2048c                 | Pks12                      | GTA>GTG      |                       |
| 2308552                     | 14R1         | NS                       | Rv2051c                 | Ppm1                       | ACG>AAG      | T735K                 |
| 2602958                     | 14R1         | S                        | Rv2329c                 | NarK1                      | AAC>AAT      |                       |
| 2853818                     | 14R1         | NS                       | Rv2529                  | hypot                      | GCC>GAC      | A315D                 |
| 2873918                     | 14R2         | NS                       | Rv2555c                 | AlaS                       | GAC>GAA      | D856E                 |
| 3140303                     | 14S          | NS                       | Rv2833c                 | UgpB                       | CAG>CGG      | Q61R                  |
| 3186286                     | 14R2         | NS                       | Rv2874                  | DipZ                       | AAA>AAC      | K480N                 |
| 3369036                     | 14S          | NS                       | Rv3010c                 | PfkA                       | CAC>CAG      | H273Q                 |
| 3403159                     | 14R1         | NS                       | Rv3042c                 | SerB2                      | CCA>TCA      | P2S                   |
| 3492131                     | 14S          | IG                       | <Rv3126c<br>Rv3127>     |                            |              |                       |
| 3665331                     | 14R1         | NS                       | Rv3283                  | SseA                       | GAA>GGA      | E135G                 |
| 3842787                     | 14S          | IG                       | Rv3425><br>Rv3426>      |                            |              |                       |
| 4081276                     | 14R1         | S                        | Rv3643                  | hypot                      | GCC>GCG      |                       |

**Patient 4**  
**OFXR-15**  
**OFXR-16**

| <b>position</b> <sup>1</sup> | <b>clone</b> | <b>class</b> <sup>2</sup> | <b>gene</b> <sup>3</sup> | <b>protein</b> <sup>4</sup> | <b>codon</b> | <b>AA</b> <sup>5</sup> |
|------------------------------|--------------|---------------------------|--------------------------|-----------------------------|--------------|------------------------|
| 7566                         | 16R2         | NS                        | Rv0006                   | GyrA                        | GAC>AAC      | D89N                   |
| 7570                         | 16R3         | NS                        | Rv0006                   | GyrA                        | GCG-GTG      | A90V                   |
| 7582                         | 15R          | NS                        | Rv0006                   | GyrA                        | GAC>GGC      | D94G                   |
| 7582                         | 16R1         | NS                        | Rv0006                   | GyrA                        | GAC>GGC      | D94G                   |
| 399110                       | 16R1         | S                         | Rv0334                   | RmlA                        | GGC>GGT      |                        |
| 686405                       | 16S          | S                         | Rv0588                   | YrbE2B                      | CTG>TTG      |                        |
| 1439105                      | 15R          | NS                        | Rv1286                   | CysN/C                      | GGC>GAC      | G67D                   |
| 1439105                      | 16R1         | NS                        | Rv1286                   | CysN/C                      | GGC>GAC      | G67D                   |
| 1439105                      | 16R3         | NS                        | Rv1286                   | CysN/C                      | GGC>GAC      | G67D                   |

\*Excluding SNP calls in repetitive regions

<sup>1</sup> Genome coordinates and wild-type sequence based on H37Rv reference NC\_000962.3

<sup>2</sup> IG = intergenic, S = synonymous, NS = non-synonymous

<sup>3</sup> Intergenic SNPs are represented by flanking genes, with arrows indicating direction of transcription

<sup>4</sup> CHP= conserved hypothetical protein, hypot = hypothetical protein

<sup>5</sup> Resulting change in protein; blank if no change
